# Supplementary material for: Pharmacist-Administered Influenza Vaccination in Children and Corresponding Regulations
Source: MDPI journal article supplement (doi:10.3390/vaccines10091410), 2022-08-28
Supplement: s1 [file s1]

**Supplementary Table S1. Current Procedural Terminology (CPT) codes for influenza**

**vaccination**

| <b>CPT Code</b> | <b>Description</b>                                      |
|-----------------|---------------------------------------------------------|
| 9952            | PROPH VACCINATION AGAINST FLU                           |
| 90470           | H1N1 IMMUNIZATION, IM AND INTRANASAL                    |
| 90630           | FLU VACC IIV4 NO PRESERV ID                             |
| 90653           | IIV ADJUVANT VACCINE IM                                 |
| 90654           | FLU VACC IIV3 NO PRESERV ID                             |
| 90655           | IIV3 VACC NO PRSV 0.25 ML IM                            |
| 90656           | IIV3 VACC NO PRSV 0.5 ML IM                             |
| 90657           | IIV3 VACCINE SPLT 0.25 ML IM                            |
| 90658           | IIV3 VACCINE SPLT 0.5 ML IM                             |
| 90659           | FLU VACCINE WHOLE IM                                    |
| 90660           | LAIV3 VACCINE INTRANASAL                                |
| 90661           | CCIIV3 VAC NO PRSV 0.5 ML IM                            |
| 90662           | IIV NO PRSV INCREASED AG IM                             |
| 90663           | FLU VACC PANDEMIC H1N1                                  |
| 90664           | LAIV VACC PANDEMIC INTRANASAL                           |
| 90666           | FLU VAC PANDEM PRSRV FREE IM                            |
| 90667           | IIV VACC PANDEMIC ADJUVT IM                             |
| 90668           | IIV VACCINE PANDEMIC IM                                 |
| 90672           | LAIV4 VACCINE INTRANASAL                                |
| 90673           | RIV3 VACCINE NO PRESERV IM                              |
| 90674           | CCIV4 VAC NO PRSV 0.5 ML IM                             |
| 90682           | RIV4 VACC RECOMBINANT DNA PRSRV ANTIBIO FREE IM         |
| 90685           | IIV4 VACC NO PRSV 0.25 ML IM                            |
| 90686           | IIV4 VACC NO PRSV 0.5 ML IM                             |
| 90687           | IIV4 VACCINE SPLT 0.25 ML IM                            |
| 90688           | IIV4 VACCINE SPLT 0.5 ML IM                             |
| 90689           | IIV4 VACC INACTIVATED, ADJUVANTED, PRSV FREE 0.25 ML IM |
| 90724           | INFLUENZA IMMUNIZATION                                  |
| 90737           | INFLUENZA B IMMUNIZATION                                |
| 90756           | IIV4 VACC INACTIVATED ABX FREE 0.5 ML                   |
| 3E01340         | INTRO FLU VACCINE SUBQ TISSUE PC                        |
| 4035F           | INFLUENZA IMM REC                                       |
| 4037F           | INFLUENZA IMM ORDER/ADMIN                               |
| G0008           | ADMINISTRATION INFLUENZA VIRUS VACC                     |
| G8108           | PT DOC RECV FLU VACC DUR FLU SEASON                     |
| G9141           | INFLUENZA A H1N1 IMMUNIZATION ADMIN                     |

|       |                                     |
|-------|-------------------------------------|
| G9142 | INFLUENZA A H1N1 VACCINE ANY ROUTE  |
| Q0034 | INFLUENZA VACCI; MEDICAR            |
| Q2033 | INF VACC RECOMB HEMAGGLUTININ AG IM |
| Q2034 | FLU VIRUS VAC SPLIT VRS IM AGRIFLU  |
| Q2035 | FLU VACC SPLIT 3 YRS & > IM AFLURIA |
| Q2036 | FLU VACC SPLIT 3 YR & > IM FLULAVAL |
| Q2037 | FLU VACC SPLIT 3 YR & > IM FLUVIRIN |
| Q2038 | FLU VACC SPLIT 3 YRS & > IM FLUZONE |
| Q2039 | INFLUENZA VIRUS VACCINE NOS         |

---
